# Supplementary material for: Microwave-assisted synthesis of highly photoluminescent core/shell CuInZnSe/ZnS quantum dots as photovoltaic absorbers
Source: Royal Society of Chemistry journal article supplement (doi:10.1039/d4na00893f), 2025-01-01
Supplement: d4na00893f1.pdf [file d4na00893f1.pdf]

## Supporting Information

### **Microwave-assisted synthesis of highly photoluminescent core/shell CuInZnSe/ZnS quantum dots as photovoltaic absorbers**

Shubham Shishodia,<sup>a,b</sup> Hervé Rinnert,<sup>b</sup> Lavinia Balan,<sup>c</sup> Jordane Jasniewski,<sup>d</sup> Stéphanie Bruyère,<sup>b</sup> Ghouti Medjahdi,<sup>b</sup> Thomas Gries,<sup>b</sup> Raphaël Schneider<sup>\*a</sup>

<sup>a</sup> Université de Lorraine, CNRS, LRGP, F-54000 Nancy, France

<sup>b</sup> Université de Lorraine, CNRS, IJL, F-54000 Nancy, France

<sup>c</sup> CEMHTI-UPR 3079 CNRS, Site Haute Température, 1D avenue de la Recherche Scientifique, 45071 Orléans, France

<sup>d</sup> Université de Lorraine, LIBio, F-54000 Nancy, France

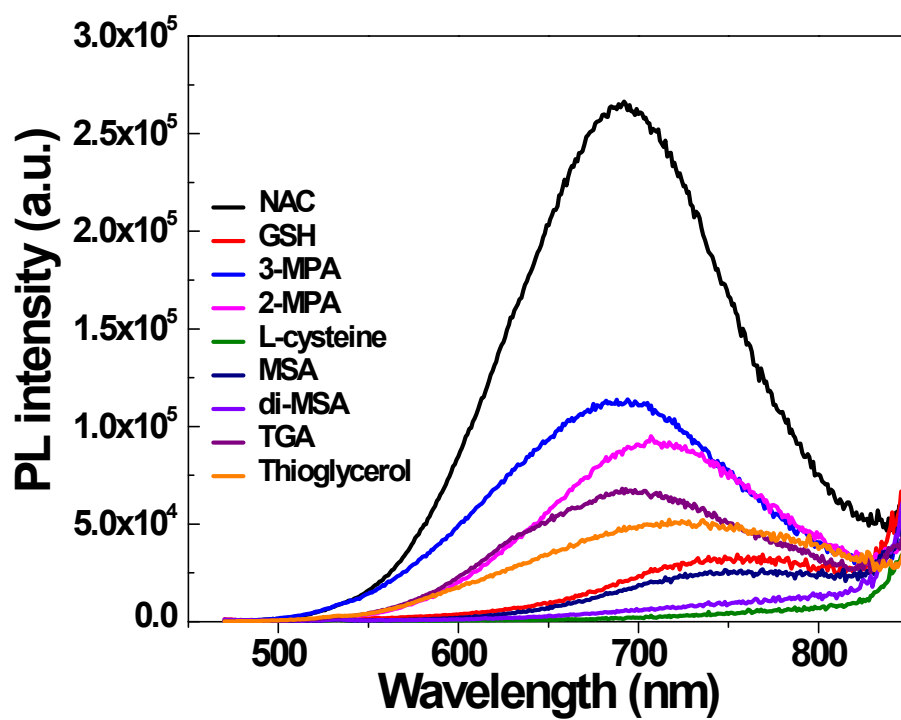

**Fig. S1.** PL emission spectra of ClZSe/ZnS QDs when varying the capping ligand (NAC : N-acetylcysteine, GSH : glutathione, 3-MPA : 3-mercaptopropionic acid, 2-MPA : 2-mercaptopropionic acid, MSA : mercaptosuccinic acid, di-MSA : dimercaptosuccinic acid, TGA : thioglycolic acid).

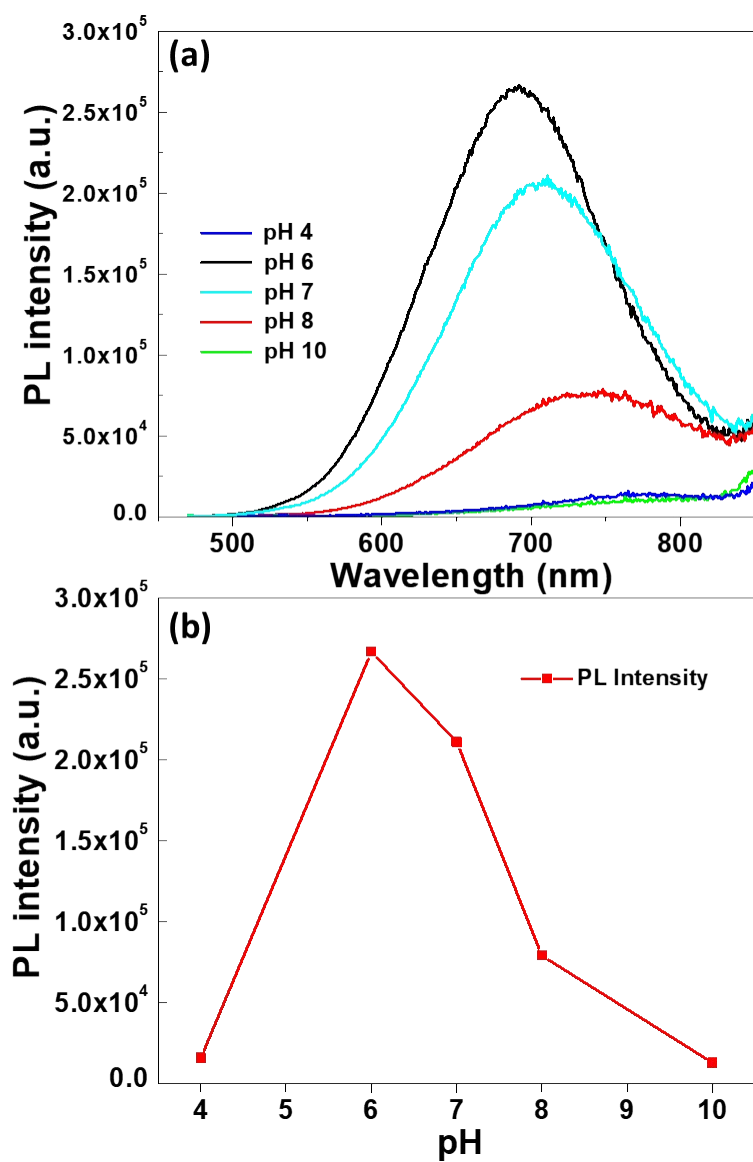

**Fig. S2.** (a) PL emission spectra of CIZSe/ZnS QDs when varying the pH of the reaction medium ( $\lambda_{\text{ex}}$  : 450 nm), (b) PL intensity of CIZSe/ZnS QDs vs pH.

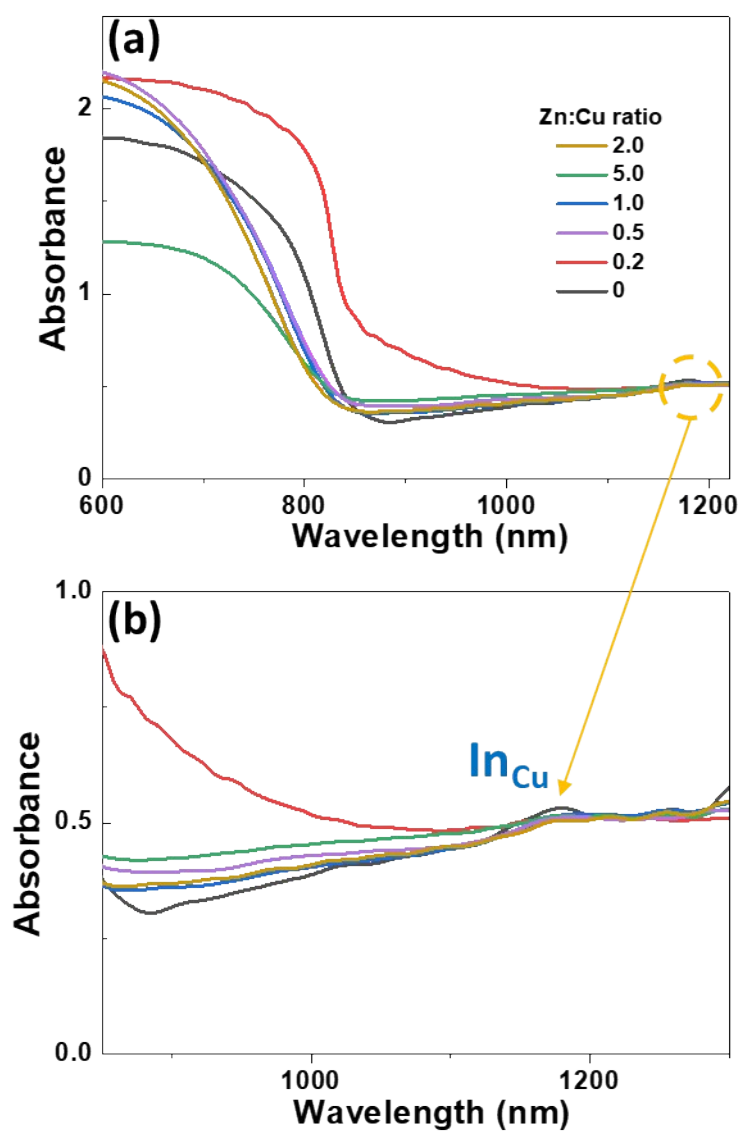

**Fig. S3.** UV-visible-near infrared diffuse reflectance spectra of ClZSe/ZnS QDs when varying the Zn:Cu ratio.

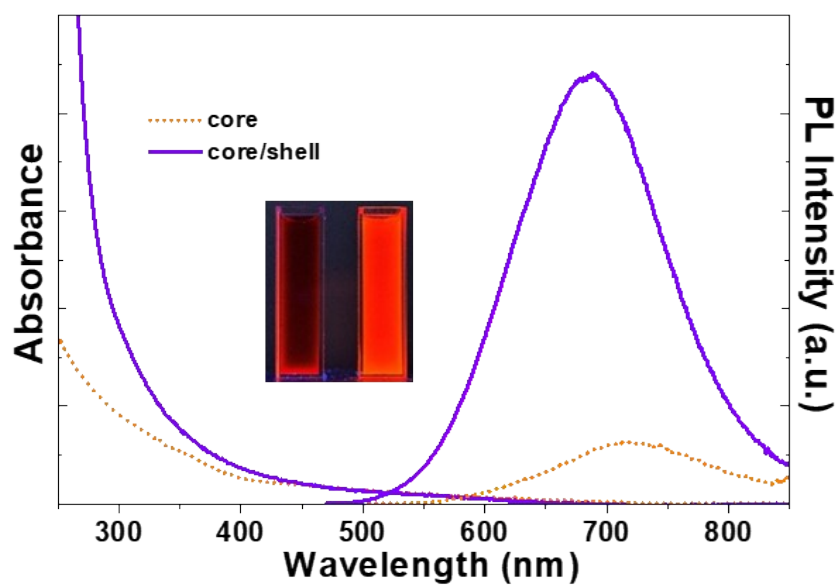

**Fig. S4.** UV-visible absorption and PL emission spectra of CIZSe (orange dotted lines) and core/shell CIZSe/ZnS QDs (violet lines). The synthesis of the CIZSe core was conducted using a Zn:Cu ratio of 0.5. PL emission spectra were recorded after excitation at 450 nm. The inset is a digital photograph of CIZSe and CIZSe/ZnS QDs colloidal dispersions under UV illumination.

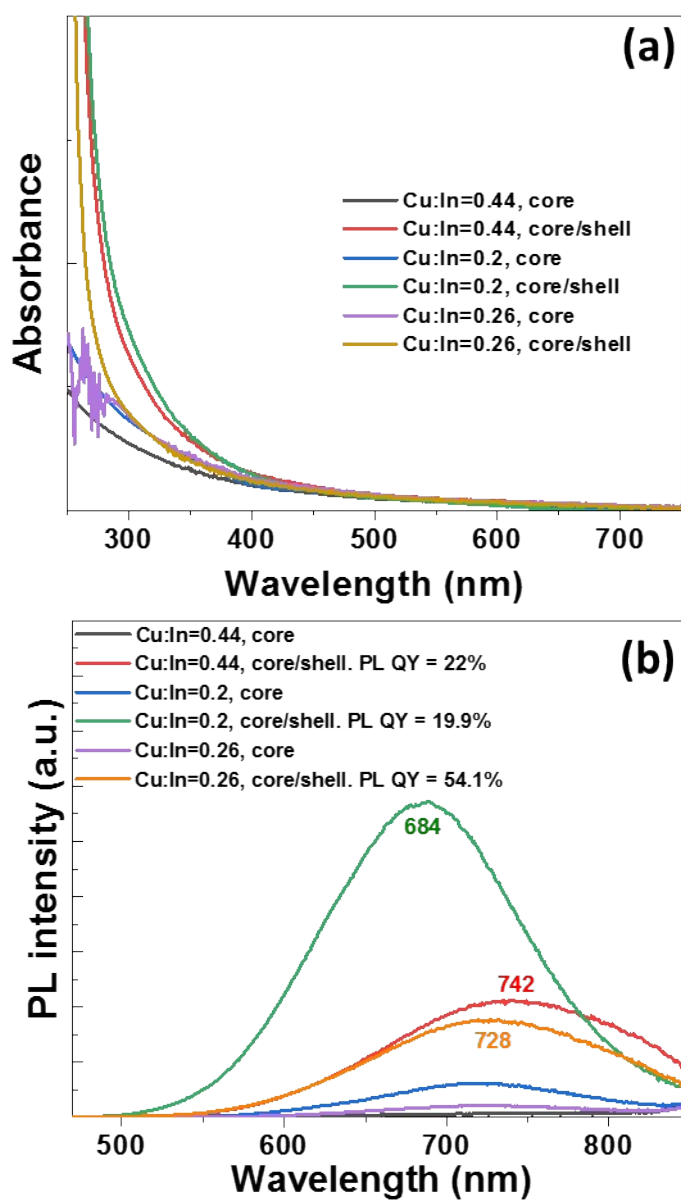

**Fig. S5.** (a) UV-visible and (b) PL emission spectra of CIZSe and CIZSe/ZnS QDs when varying the Cu:In molar ratio.

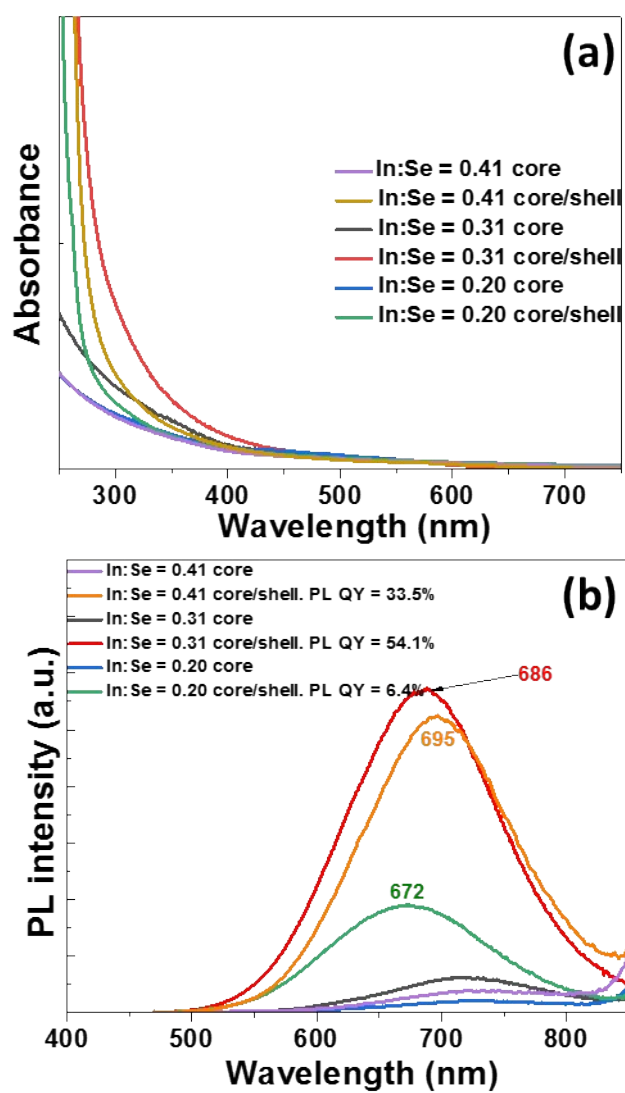

**Fig. S6.** (a) UV-visible and (b) PL emission spectra of CIZSe and CIZSe/ZnS QDs when varying the In:Se molar ratio.

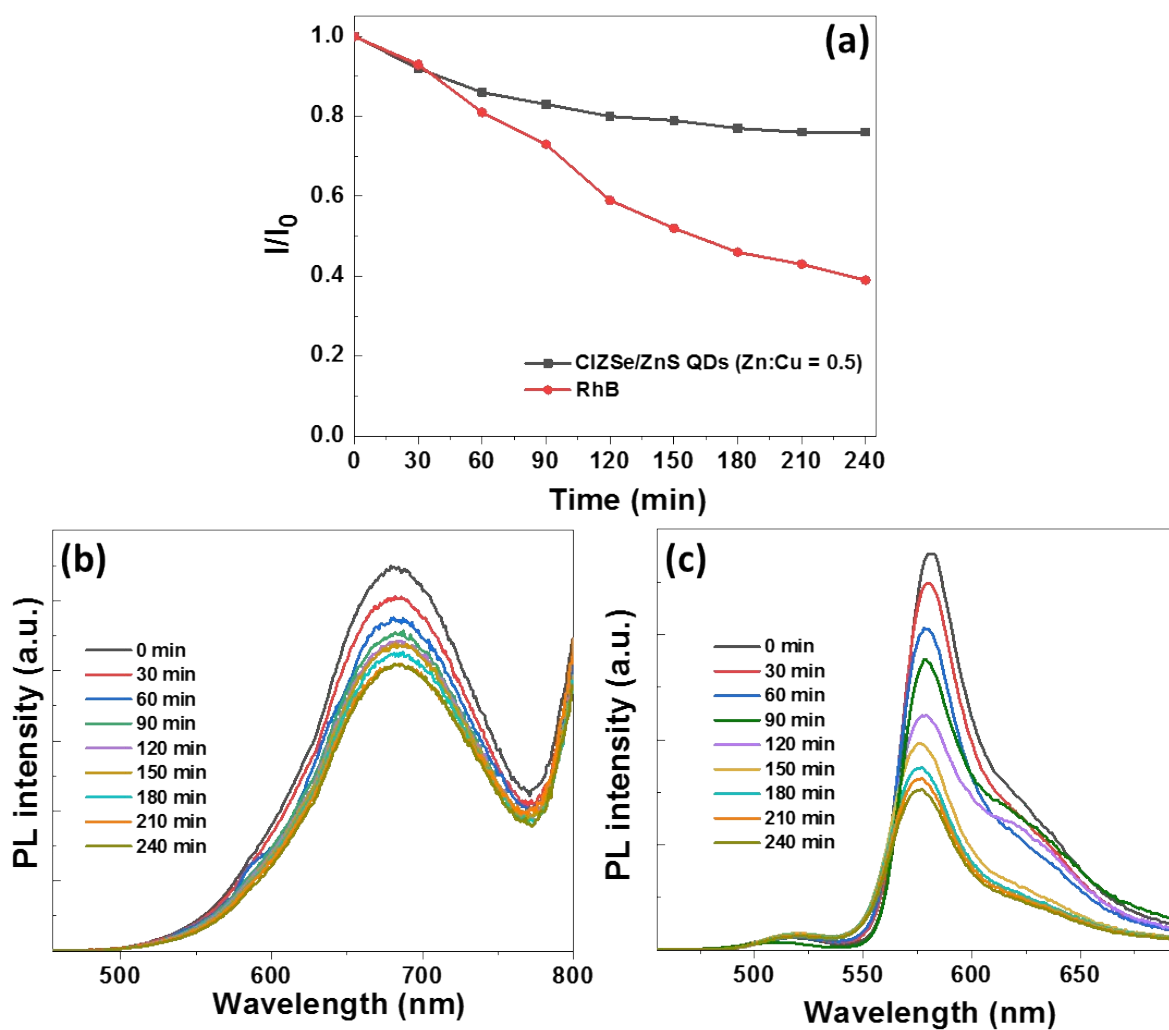

**Fig. S7.** (a) Photostability of CIZSe/ZnS (Zn:Cu = 0.5) and Rhodamine B under the continuous irradiation of a Hg/Xe lamp (light irradiance of 50 mW/cm<sup>2</sup>). Evolution of PL emission spectra of (b) CIZSe/ZnS QDs and (c) Rhodamine B during the irradiation.



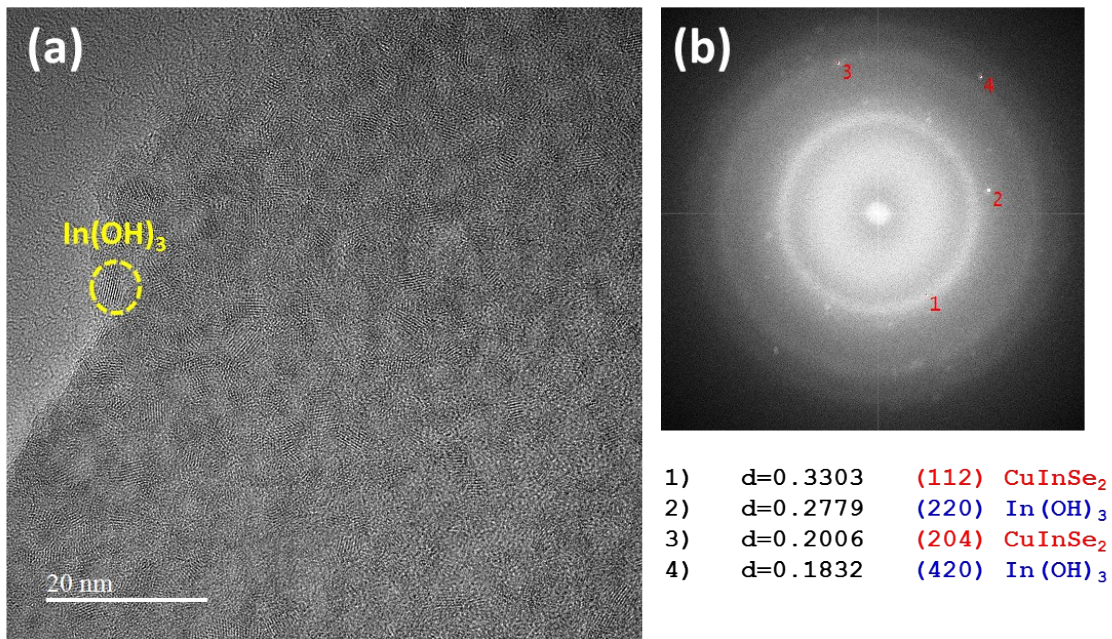

**Fig. S8.** (a) TEM image of CIZSe/ZnS QDs prepared with a Zn:Cu ratio of 2.0, (b) the associated SAED pattern showing the co-existence of CIZSe/ZnS and In(OH)<sub>3</sub> in the sample. The observed diffraction rings correspond to the (112) and (204) planes of the chalcopyrite tetragonal structure of CIZSe/ZnS QDs and to the (220) and (420) planes of cubic In(OH)<sub>3</sub>.

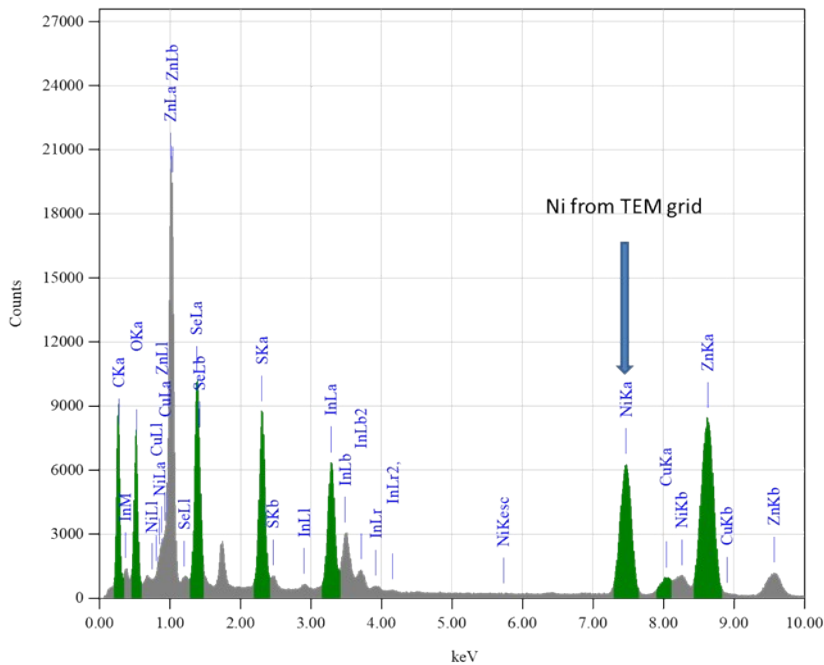

**Fig. S9.** EDX analysis of CIZSe/ZnS (Zn:Cu = 0.5).

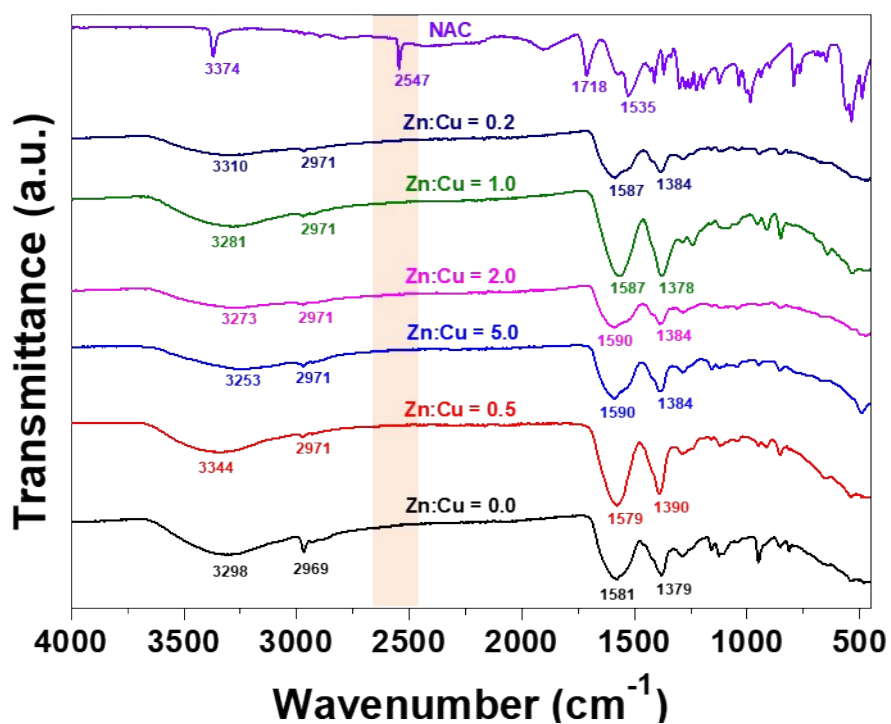

Fig. S10. FT-IR spectra of NAC and CIZSe/ZnS QDs.

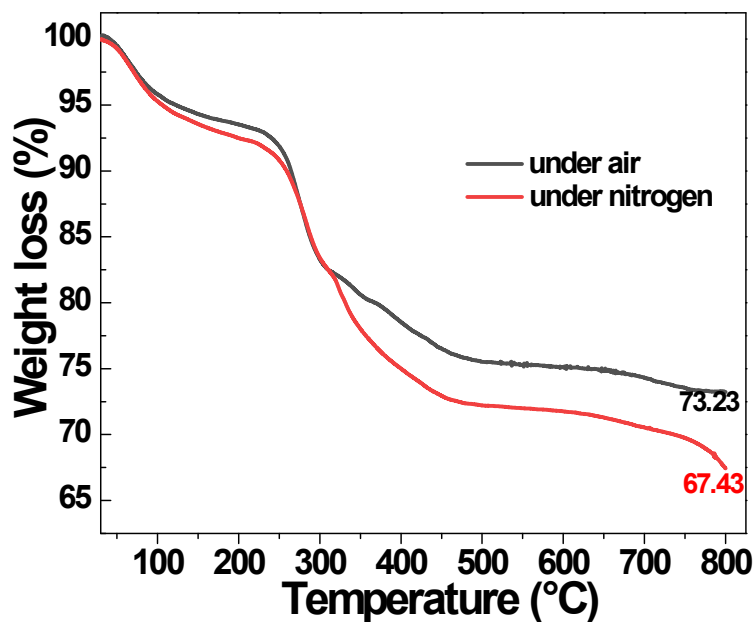

Fig. S11. TGA traces of CIZSe/ZnS QDs under air and under nitrogen.

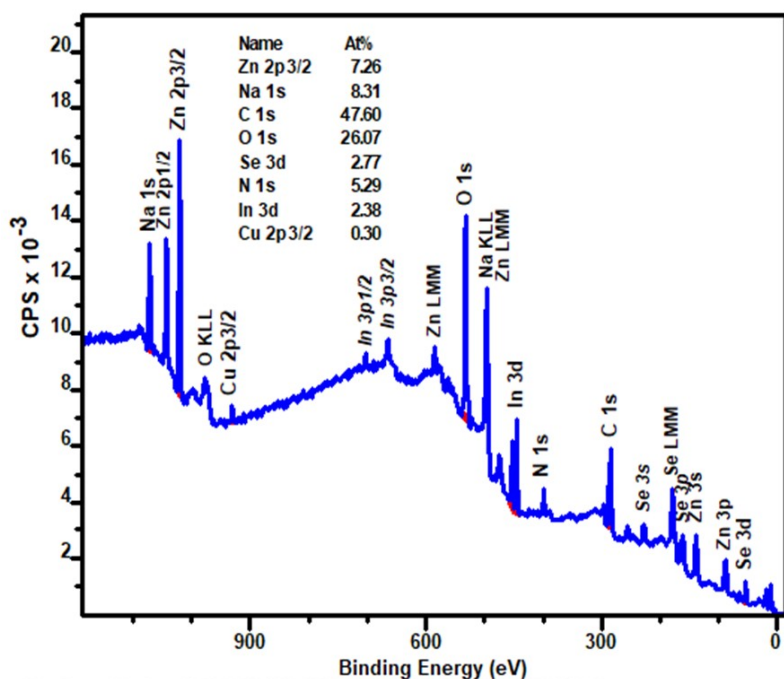

Fig. S12. XPS overview spectrum of ClZSe/ZnS QDs.

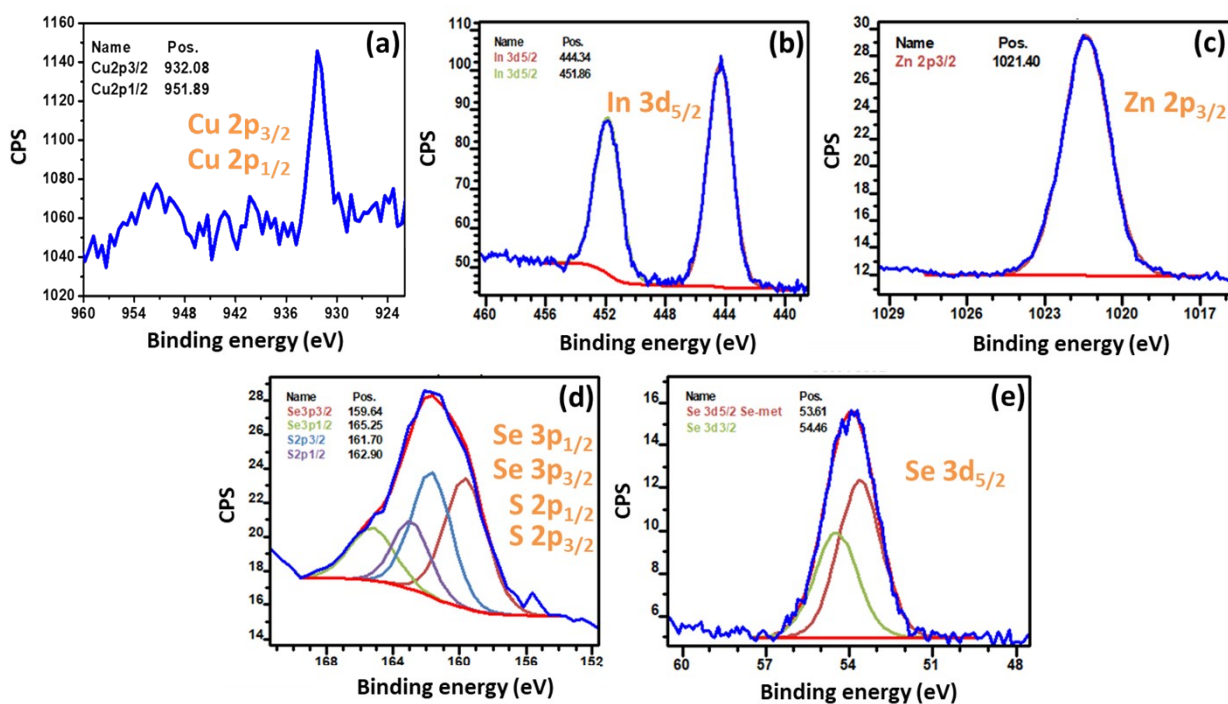

Fig. S13. HR-XPS spectra of (a) Cu 2p, (b) In 3d, (c) Zn 2p, (d) Se 3p and S 2p and (e) Se 3d.

**Table S1.** Theoretical and experimental Cu/In/Zn molar ratio determined by ICP/OES.

| <b>Zn:Cu</b> | <b>Theoretical Cu/In/Zn molar ratio</b> | <b>Cu/In/Zn molar ratio determined by ICP/OES</b> |
|--------------|-----------------------------------------|---------------------------------------------------|
| 0            | 1/3.3/28                                | 1/2.8/9.3                                         |
| 0.2          | 1/4/33.8                                | 1/3.1/10.5                                        |
| 0.5          | 1/10/85                                 | 1/7.4/25.2                                        |
| 1            | 1/6.6/57                                | 1/5.4/18.8                                        |
| 2            | 1/10/86                                 | 1/8.1/25.2                                        |
| 5            | 1/20/171                                | 1/16.4/61.5                                       |

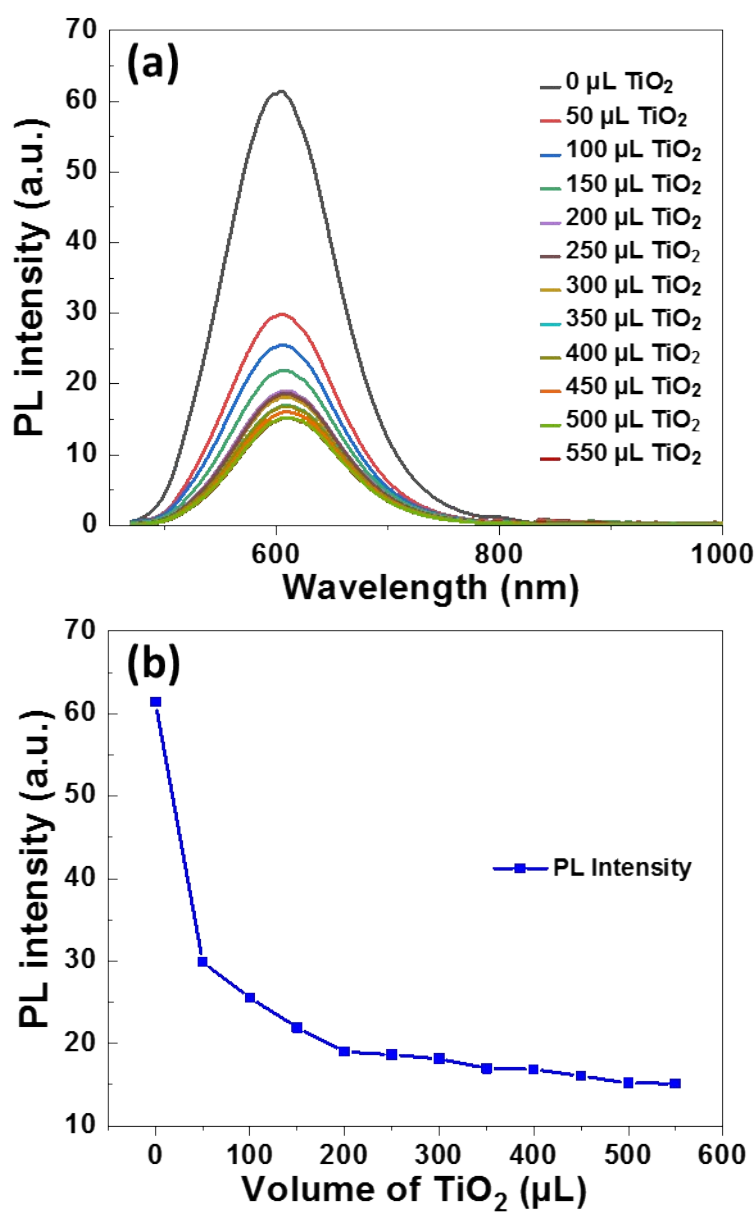

**Fig. S14.** (a) PL emission spectra of ClZSe/ZnS QDs before and after addition of increasing amounts of a TiO<sub>2</sub> colloid (50 μL of TiO<sub>2</sub> is added in increments to 3 mL of a QDs dispersion in water), (b) PL intensity vs volume of TiO<sub>2</sub> colloid added.
